# Supplementary material
Source: PubMed Central journal article supplement (PMC6105323)

## SUPPLEMENTARY DATA

### Supplementary Table S1. Type 1 Diabetes TrialNet Study Group

Steering Committee: C. J. Greenbaum, Chair (Benaroya Research Institute), M. Anderson (University of California, San Francisco), P. Antinozzi (Wake Forest University), M. Atkinson (University of Florida), M. Battaglia (San Raffaele Diabetes Research Institute), D. Becker (University of Pittsburgh), P. Bingley (University of Bristol), E. Bosi (San Raffaele University), J. Buckner (Benaroya Research Institute), P. Colman (Walter & Eliza Hall Institute of Medical Research), L. DiMeglio (Indiana University), S. Gitelman, (University of California, San Francisco), R. Goland (Columbia University), P. Gottlieb (University of Colorado Barbara Davis Center for Childhood Diabetes), K. Herold (Yale University), R. Insel (Juvenile Diabetes Research Foundation), T. Kay (St Vincent's Institute of Medical Research), M. Knip (University of Helsinki), J. Krischer (University of South Florida), A. Lernmark (Skane University), J.B. Marks (University of Miami), A. Moran (University of Minnesota), J. Palmer (University of Washington), M. Peakman (King's College), L. Philipson (University of Chicago), A. Pugliese (University of Miami), P. Raskin (University of Texas Southwestern), M. Redondo (Baylor College of Medicine), H. Rodriguez (University of South Florida), B. Roep (Leiden University Medical Center), W. Russell (Vanderbilt University), L. Spain (National Institute of Diabetes and Digestive and Kidney Diseases [NIDDK]), D.A. Schatz (University of Florida), J. Sosenko (University of Miami), D. Wherrett (University of Toronto), D. Wilson (Stanford University), W. Winter (University of Florida), A. Ziegler (Forschergruppe Diabetes); Previous Members: C. Benoist (Joslin Diabetes Center), J. Blum (Indiana University), K. Bourcier, P. Chase (University of Colorado Barbara Davis Center for Childhood Diabetes), M. Clare-Salzler (University of Florida), R. Clynes (Columbia University), G. Eisenbarth (University of Colorado Barbara Davis Center for Childhood Diabetes), C. G. Fathman (Stanford University), G. Grave (National Institute of Child Health and Human Development), B. Hering (University of Minnesota), F. Kaufman (Children's Hospital Los Angeles), E. Leschek (NIDDK), J. Mahon (University of Western Ontario), K. Nanto-Salonen (University of Turku), G. Nepom (Benaroya Research Institute), T. Orban (Joslin Diabetes Center), R. Parkman (Children's Hospital Los Angeles), M. Pescovitz (Indiana University), J. Peyman (National Institute of Allergy and Infectious Disease), M. Roncarolo (San Raffaele University), P. Savage (NIDDK), O. Simell (University of Turku), R. Sherwin (Yale University), M. Siegelman (University of Texas Southwestern), J.S. Skyler (University of Miami), A. Steck (University of Colorado Barbara Davis Center for Childhood Diabetes), J. Thomas (Vanderbilt University), M. Trucco (University of Pittsburgh), J. Wagner (University of Minnesota).

Executive Committee: Carla J. Greenbaum, Katarzyna Bourcier, Richard Insel, Jeffrey P. Krischer, Ellen Leschek, Lisa Rafkin, Lisa Spain. Past Members: Catherine Cowie, Mary Foulkes, Heidi Krause-Steinrauf, John M. Lachin, Saul Malozowski, John Peyman, John Ridge, Peter Savage, Jay S. Skyler, Stephanie J. Zafonte.

Chairman's Office: Carla J. Greenbaum, Norma S. Kenyon, Lisa Rafkin, Irene Santiago, Jay M. Sosenko. Past Member: Jay S. Skyler,

TrialNet Coordinating Center (University of South Florida): Jeffrey P. Krischer, Brian Bundy, Michael Abbondandolo, Timothy Adams, Darlene Amado, Ilma Asif, Matthew Boonstra, Brian Bundy, Cristina Burroughs, David Cuthbertson, Mary Deemer, Christopher Eberhard, Steve Fiske, Julie Ford, Jennifer Garmeson, Heather Guillette, Susan Geyer, Brian Hays, Courtney Henderson, Martha Henry, Kathleen Heyman, Belinda Hsiao, Christina Karges, Nichole Keaton, Amanda Kinderman, Pat Law, Ashely Leinbach, Cristin Linton, Shu Liu, Jennifer Lloyd, Jamie Malloy, Kristin Maddox, Julie Martin, Jessica Miller, Eric Milliot, Margaret Moore, Sarah Muller, Thuy Nguyen, Ryan O'Donnell, Vanessa Oduah, Jennifer Pilger, Amy Roberts, Kelly Sadler, Tina Stavros, Roy Tamura, Keith Wood, Ping Xu, Kenneth Young. Past Staff Members: Persida Alies, Franz Badias, Aaron Baker, Monica Bassi, Craig Beam, David Boulware, London Bounmananh, Susan Bream, Doug Freeman, Jessica Gough, Jinin Ginem, Moriah Granger, Mary Holloway Michelle Kieffer, Page

## SUPPLEMENTARY DATA

Lane, Lavanya Nallamshetty, Yazandra Parrimon, Kate Paulus, Joy Ramiro, AQesha Luvon Ritzie, Archana Sharma, Audrey Shor, Xiaohong Song, Amanda Terry, Jeanne Weinberger, Margaret Wootten.

Previous Coordinating Center (George Washington University): John M. Lachin, Mary Foulkes, Pamela Harding, Heidi Krause-Steinrauf, Susan McDonough, Paula F. McGee, Kimberly Owens Hess, Donna Phoebus, Scott Quinlan, Erica Raiden.

TrialNet Clinical Network HUB (Benaroya Research Institute): Carla J. Greenbaum, Emily Batts, Chris Buddy, Kristin Kirpatrick, Mary Ramey, Ann Shultz, Chris Webb, Past Member: Melita Romesco.

NIDDK Staff: Judith Fradkin, Ellen Leschek, Lisa Spain. Past Member: Peter Savage.

Data Safety and Monitoring Board: Emily Blumberg (University of Pennsylvania), Chair, Gerald Beck (Cleveland Clinic), David Brillon (Cornell University), Rose Gubitosi-Klug (Case Western Reserve), Lori Laffel (Joslin Diabetes Center), Robert Veatch (Georgetown University), Dennis Wallace (Research Triangle Institute). Past Members: Jonathan Braun (University of California Los Angeles), Ake Lernmark (Lund University), Bernard Lo (University of California San Francisco), Herman Mitchell (Rho Inc.), Ali Naji (University of Pennsylvania), Jorn Nerup (University of Copenhagen), Trevor Orchard (University of Pittsburgh), Michael Steffes (University of Minnesota), Anastasios Tsiatis (North Carolina State University), Bernard Zinman (University of Toronto).

Infectious Disease Safety Committee: Brett Loechelt (Children's National Medical Center) (Medical Monitor), Lindsey Baden (Harvard University), Michael Green (University of Pittsburgh), Adriana Weinberg (University of Colorado).

Laboratory Directors: Santica Marcovina (University of Washington), Jerry P. Palmer, Adriana Weinberg, Liping Yu (University of Colorado Barbara Davis Center for Childhood Diabetes), Sunanda Babu (University of Colorado Barbara Davis Center for Childhood Diabetes) William Winter (University of Florida). Past Member: George S. Eisenbarth (late).

Protocol Chair Committee: Polly Bingley, Raphael Clynes, Linda DiMeglio, George Eisenbarth, Carla Greenbaum, Brian Hays, Jeffrey Krischer, Ellen Leschek, Jennifer Marks, Della Matheson, Lisa Rafkin, Henry Rodriguez, Jay Skyler, Jay Sosenko, Lisa Spain, Darrell Wilson.

### Clinical Center Staff Involved in this Protocol:

Baylor College of Medicine: Maria J Redondo, David Gomez, Xiati Zheng, Sandra Pena, Massimo Pietropaolo.

Benaroya Research Institute, Seattle: Carla Greenbaum, Emily Batts, Tyler Brown, Jane Buckner, Angela Dove, Marissa Hammond, Deborah Hefty, Jani Klein, Kristen Kuhns, McKenzie Letlau, Sandra Lord, Marli McCulloch-Olson, Lisa Miller, Gerald Nepom, Jared Odegard, Mary Ramey, Elaine Sachter, Marissa St. Marie, Kimberly Stickney, Dana VanBuecken, Ben Vellek, Christine Webber. Past Members: Laurie Allen, Jenna Bollyk, Nicole Hilderman, Hebatullah Ismail, Steve Lamola, Srinath Sanda, Heather Vendettuoli, David Tridgell.

Children's Hospital Los Angeles: Roshanak Monzavi, Meredith Bock, Lynda Fisher, Mary Halvorson, Debra Jeandron, Mimi Kim, Jamie Wood. Past Members: Mitchell Geffner, Francine Kaufman, Robertson Parkman, Christine Salazar.

## SUPPLEMENTARY DATA

Columbia University, New York: Robin Goland, Raphael Clynes, Steve Cook, Matthew Freeby, Mary Pat Gallagher, Rachelle Gandica, Ellen Greenberg, Amy Kurland, Sarah Pollak, Amy Wolk. Past Members: Mary Chan, Linda Koplinae, Elizabeth Levine, Kelly Smith, Jeniece Trast.

Indiana University, Indianapolis: Linda DiMeglio, Janice Blum, Carmella Evans-Molina, Robin Hufferd, Bonnie Jagielo, Christy Kruse, Vanessa Patrick, Mark Rigby, Maria Spall, Kim Swinney, Jennifer Terrell. Past Members: Lyla Christner, LeeAnn Ford, Sheryl Lynch, Martha Menendez, Patricia Merrill, Mark Pescovitz (late), Henry Rodriguez.

Joslin Diabetes Center, Boston: Cielo Alleyn, David Baidal, Steve Fay, Jason Gaglia, Brittany Resnick, Sarah Szubowicz, Gordon Weir. Past Members: Ronald Benjamin, Debbie Conboy, Andrea deManbey, Richard Jackson, Heyam Jalahej, Tihmar Orban, Alyne Ricker, Joseph Wolfsdorf, Hui H. Zhang.

Stanford University: Darrell Wilson, Tandy Aye, Bonita Baker, Karen Barahona, Bruce Buckingham, Kerry Esrey, Trudy Esrey, Garry Fathman, Radhika Snyder. Past Members: Beenu Aneja, Maya Chatav, Oralia Espinoza, Eliana Frank, Jenny Liu, Jennifer Perry, Rebecca Pyle, Alison Rigby, Kristin Riley, Adriana Soto.

University of California San Francisco: Stephen Gitelman, Saleh Adi, Mark Anderson, Ashley Berhel, Kathy Breen, Kathleen Fraser, Andrea Gerard-Gonzalez, Paula Jossan, Robert Lustig, Sara Moassesfar, Amy Mugg, David Ng, Priya Prahalod, Martha Rangel-Lugo, Srinath Sanda, Joshua Tarkoff, Christine Torok, Rebecca Wesch. Past Members: Ivy Aslan, Jeanne Buchanan, Jennifer Cordier, Celia Hamilton, Louise Hawkins, Thu Ho, Anjali Jain, Karen Ko, Theresa Lee, Shelly Phelps, Stephen Rosenthal, Taninee Sahakitrungruang, Lorraine Stehl, Lisa Taylor, Marcia Wertz, Jenise Wong.

University of Chicago: Louis Philipson, Rosemary Briars, Nancy Devine, Elizabeth Littlejohn. Past Member: Tiffany Grant.

University of Colorado Barbara Davis Center for Childhood Diabetes, Aurora: Peter Gottlieb, Georgeanna Klingensmith, Andrea Steck, Aimon Alkanani, Kimberly Bautista, Ruth Bedoy, Aaron Blau, Betsy Burke, Laraine Cory, MyLinh Dang, Lisa Fitzgerald-Miller, Alex Fouts, Vicky Gage, Satish Garg, Patricia Gesauldo, Raymond Gutin, Cory Hayes, Michelle Hoffman, Kaitlin Ketchum, Nyla Logsdan-Sackett, David Maahs, Laurel Messer, Lisa Meyers, Aaron Michels, Stesha Peacock, Marian Rewers, Perla Rodriguez, Flor Sepulbeda, Rachel Sippl, Andrea Steck, Iman Taki, Bao-Khan Tran, Tuan Tran, R. Paul Wadwa, Philip Zeitler. Past Members: Jennifer Barker, Sandra Barry, Laurie Birks, Leah Bomsburger, Terra Bookert, Leah Briggs, Patricia Burdick, Rosio Cabrera, Peter Chase, Erin Cobry, Amy Conley, Gabrielle Cook, Joseph Daniels, Dominic DiDomenico, Jennifer Eckert, Angelica Ehler, George Eisenbarth (late), Pamela Fain, Rosanna Fiallo-Scharer, Nicole Frank, Hannah Goettle, Michelle Haarhues, Sherrie Harris, Lauren Horton, John Hutton (late), Joy Jeffrrey, Rachael Jenison, Kelly Jones, Whitney Kastelic, Maria Amelia King, Debbie Lehr, Jenna Lungaro, Kendra Mason, Heather Maurer, Luy Nguyen, Allison Proto, Jaime Realsen, Kristina Schmitt, Mara Schwartz, San Skovgaard, Jennifer Smith, Brandon Vanderwel, Mary Voelmle, Rebecca Wagner, Amy Wallace, Philip Walravens, Laurie Weiner, Becky Westerhoff, Emily Westfall, Katina Widmer, Hali Wright.

University of Florida, Gainesville: Desmond Schatz, Annie Abraham, Mark Atkinson, Miriam Cintron, Michael Clare- Salzler, Jessica Ferguson, Michael Haller, Jennifer Hosford, Diane Mancini, Hank Rohrs, Janet Silverstein, Jamie Thomas, William Winter. Past Members: Gloria Cole, Roberta Cook, Ryan Coy, Elena Hicks, Nancy Lewis.

## SUPPLEMENTARY DATA

University of Miami: Jennifer Marks, Alberto Pugliese, Carlos Blaschke, Della Matheson, Alberto Pugliese, Natalia Sanders-Branca, Jay Sosenko. Past Members: Luz Arazo Ray Arce, Mario Cisneros, Samir Sabbag.

University of Minnesota, Minneapolis: Antoinette Moran, Carrie Gibson, Brian Fife, Bernhard Hering, Christine Kwong, Janice Leschyshyn, Brandon Nathan, Beth Pappenfus, Anne Street. Past Members: Mary Ann Boes, Sarah Peterson Eck, Lois Finney, Theresa Albright Fischer, Andrea Martin, Chenai Jacqueline Muzamhindo, Missy Rhodes, Jennifer Smith, John Wagner, Bryan Wood.

University of Pittsburgh: Dorothy Becker, Kelli Delallo, Ana Diaz, Barbara Elnyczky, Ingrid Libman, Beata Pasek, Karen Riley, Massimo Trucco. Past Members: Brian Copemen, Diane Gwynn, Frederico Toledo.

University of South Florida: Henry Rodriguez, Sureka Bollepalli, Frank Diamond, Emily Eyth, Danielle Henson, Anne Lenz, Dorothy Shulman.

University of Texas Southwestern, Dallas: Phillip Raskin, Soumya Adhikari, Brian Dickson, Erin Dunnigan, Ildiko Lingvay, Lourdes Pruneda, Maria Ramos-Roman, Philip Raskin, Chanhaeng Rhee, John Richard, Mark Siegelman, Daytheon Sturges, Kathryn Sumpter, Perrin White. Past Members: Marilyn Alford, Jamie Arthur, M. Larissa Aviles-Santa, Erica Cordova, Renee Davis, Stefani Fernandez, Steve Fordan, Tauri Hardin, Aris Jacobs, Polina Kaloyanova, Ivanna Lukacova-Zib, Sasan Mirfakhraee, Alok Mohan, Hiroshi Noto, Oralenda Smith, Nenita Torres.

University of Toronto: Diane Wherrett, Diana Balmer, Lesley Eisel, Roze Kovalakovska, Mala Mehan, Farah Sultan. Past Members: Brenda Ahenkorah, Jose Cevallos, Natasha Razack, Mary Jo Ricci, Angela Rhode, Mithula Srikandarajah, Rachel Steger.

Vanderbilt University, Nashville: William E. Russell, Margo Black, Faith Brendle, Anne Brown, Daniel Moore, Eric Pittel, Alyssa Robertson, April Shannon, James W. Thomas.

Yale University, New Haven: Kevan Herold, Laurie Feldman, Robert Sherwin, William Tamborlane, Stuart Weinzimer.

### International Clinical Center Staff involved in this Protocol:

Hospital District of Southwest Finland: Jorma Toppari, Tiina Kallio, Maarit Kärkkäinen, Elina Mäntymäki, Tiina Niininen, Birgitta Nurmi, Petro Rajala, Minna Romo, Sointu Suomenrinne. Past Members: Kirsti Näntö-Salonen, Olli Simell, Tuula Simell.

San Raffaele Hospital (Italy): Emanuele Bosi, Manuela Battaglia, Eleonora Bianconi, Riccardo Bonfanti, Pauline Grogan, Andrea Laurenzi, Sabina Martinenghi, Franco Meschi, Matteo Pastore. Past Members: Luca Falqui, Maria Teresa Muscato, Matteo Viscardi.

University of Bristol (United Kingdom): Polly Bingley, Harriet Castleden, Nicola Farthing, Sam Loud, Claire Matthews, Jennifer McGhee, Ann Morgan, Joanna Pollitt. Past Members: Rebecca Elliot-Jones, Carole Wheaton.

University of Helsinki: Mikael Knip, Heli Siljander, Heli Suomalainen.

Walter and Eliza Hall Institute of Medical Research (Australia): Peter Colman, Felicity Healy, Shelley Mesfin, Leanne Redl, John Wentworth, Jinny Willis. Past Members: Maree Farley, Leonard Harrison, Christine Perry, Fiona Williams.

## SUPPLEMENTARY DATA

### TrialNet On-line List of Affiliate Investigators:

*TrialNet Affiliates:* Aberdeen, Scotland: A. Mayo, J. Paxton, V. Thompson; Ajo, AZ- L. Volin; Akron, OH- C. Fenton, L. Carr, E. Lemon, M Swank; Albany, NY- M.K. Luidens, M. Salgam, V. Sharma; Albuquerque, NM- D. Schade, C. King; Ames, IA- R. Carano, J. Heiden; Anchorage, AK- N.D Means, L. Holman; Ann Arbor, MI- I. Thomas, D. Madrigal, T. Muth, C.L. Martin, C. Plunkett, C. Ramm, R.J. Auchus; Asheville, NC- W. Lane, E. Avots, M. Buford, C. Hale, J. Hoyle, B. Lane; Atlanta, GA- A. Muir, S. Shuler, N. Raviele, E. Ivie, M. Jenkins, K. Lindsley, I. Hansen, D.O. Fadoju, E.I. Felner, B. Bode, R. Hosey, J. Sax; Auckland, NZ - C. Jefferies, S. Mannering, R. Prentis; Augusta, GA- J.X. She, M. Stachura, D. Hopkins, J. Williams, L. Steed, E. Asatapova; Austin, TX- S. Nunez, S. Knight, P. Dixon; Bakersfield, CA- J. Ching; Baltimore, MD- T. Donner, S. Longnecker, K. Abel, K. Arcara, S. Blackman, L. Clark, D. Cooke, L. Plotnick, P.A. Levin, L. Bromberger, K. Klein; Bangor, ME- K. Sadurska, C. Allen, D. Michaud, H. Snodgrass; Bartlett, TN- G. Burghen, S. Chatha, C. Clark; Baton Rouge, LA- J. Silverberg, C. Wittmer, J. Gardner, C. LeBoeuf ; Belfast, Ireland- P. Bell, O. McGlore, H. Tennes, N. Alba; Bend, OR- M. Carroll, L. Baert, H. Beaton, E. Cordell, A. Haynes, C. Reed, K. Lichter, P. McCarthy, S. McCarthy, T. Monchamp, J. Roach, S. Manies; Billings, MT- F. Gunville, L. Marosok, T. Nelson, K. Ackerman, J. Rudolph, M. Stewart; Birmingham, AL- K. McCormick, S. May, T. Falls; Birmingham, UK - T. Barrett, K. Dale, L. Makusha, C. McTernana, K. Penny-Thomas, K. Sullivan, P. Narendran, J. Robbie, D. Smith; Boise, ID- R. Christensen, B. Koehler, C. Royal, T. Arthur, H. Houser, J. Renaldi, S. Watsen; Bonita, CA- P. Wu, L. Lyons, B. House, J. Yu; Bournemouth, UK- H. Holt, M. Nation, C. Vickers, R. Watling; Bronx, NY- R. Heptulla, J. Trast, C. Agarwal, D.J. Newell, R. Katikaneni; Brunley, UK- C. Gardner, A. Del Rio, A. Logan, H. Collier, C. Rishton, G. Whalley, A. Ali, S. Ramtoola; Buffalo, NY- T. Quattrin, L. Mastrandea, A.J. House, M. Ecker; Calgary, AB- C. Huang, C. Gougeon, J. Ho, D. Pacuad; Cambridge, UK- D. Dunger, J. May, C. O'Brien, C. Acerini, B. Salgin, A. Thankamony, R. Williams; Chapel Hill, NC- J. Buse, G. Fuller, M. Duclos, J. Tricome, H. Brown, D. Pittard; Charleston, SC- D. Bowlby, A. Blue, T. Headley; Charleston, WV- S. Bendre, K. Lewis, K. Sutphin; Charlottesville, VA- C. Soloranzo, J. Puskaric, H. Madison; Chattanooga, TN- M. Rincon, M. Carlucci, R. Shridharani, B. Rusk, E. Tessman, D.M. Huffman, H. Abrams, B. Biederman, M.D. Jones, V. Leathers; Chicago, IL- W. Brickman, P. Petrie, D. Zimmerman, J. Howard, L. Miller, R. Alemzadeh, D.V. Mihalescu, R. Melgozza-Walker, N. Abdulla, C. Boucher-Berry, D. Ize-Ludlow, R. Levy, C. Swenson Brousell; Christchurch, NZ- R. Scott, H. Heenan, H. Lunt, D. Kendall, J. Willis, B. Darlow; Cincinnati, OH- N. Crimmins, D. Edler, T. Weis, C. Schultz; Cleveland, OH- D. Rogers, D. Latham, C. Mawhorter, C. Switzer, W. Spencer, P. Konstantinopoulos, S. Broder, J. Klein; Columbia, MO- B. Bachrach, M. Gardner, D. Eichelberger; Columbia, SC- L. Knight, L. Szadek, G. Welnick, B. Thompson; Columbus, OH- R. Hoffman, A. Revell, J. Cherko, K. Carter, E. Gilson, J. Haines, G. Arthur, B. Bowen, W.B. Zipf, P. Graves, R.A. Lozano, D. Seiple, K. Spicer; Concord, CA- A. Chang, J. Fregosi, J. Harbinson, C. Paulson, S. Stalters, P. Wright, D. Zlock; Cooperstown, NY- A.E. Freeth, J. Victory; Crystal Lake, IL- H. Maheshwari, A. Maheshwari, T. Holmstrom, J. Bueno; Danbury, CT- R. Arguello, J. Ahern, L. Noreika, V. Watson, S. Hourse; Dayton, OH- P. Breyer, C. Kissel, Y. Nicholson, M. Pfeifer, S. Almazan; Denver, CO- J. Bajaj, M. Quinn, K. Funk, J. McCance, E. Moreno, R. Veintimilla, A. Wells; Des Moines, IA- J. Cook, S. Trunnel; Detroit, MI- D. Transue, J. Surhigh, D. Bezzaire, K. Moltz, E. Zacharski; Downers Grove, IL- J. Henske, S. Desai, K. Frizelis, F. Khan; Duluth, MN- R. Sjoberg, K. Allen; Dunedin, NZ- P.P Manning, G. Hendry, B. Taylor, S. Jones; Edmonton, AB- R. Couch, R. Danchak, D. Lieberman; El Paso, TX- W. Strader, M.E. Bencomo; Escondido, CA- T. Bailey, L. Bedolla, C. Roldan; Exeter, UK- C. Moudiotis, B. Vaidya, C. Anning, S. Bunce, S. Estcourt, E. Folland, E. Gordon, C. Harrill, J. Ireland, J. Piper, L. Scaife, K. Sutton, S. Wilkins, M. Costelloe, J. Palmer; Fargo, ND- L. Casas, C. Miller, M. Burgard, C. Erickson, J. Hallanger-Johnson; Florence, SC- P. Clark, W. Taylor; Florissant, MO- J. Galgani; Fresno, CA- S. Banerjee, C. Banda, D. McEowen, R. Kinman; Garran, Australia- A. Lafferty, S. Gillett, C. Nolan, M. Pathak; Grand Folks, ND- L. Sondrol, T. Hjelle, S. Hafner, J. Kotrba, R. Hendrickson; Grand Rapids, MI- A.P. Cemeroglu, T. Symington, M. Daniel, Y. Appiagyei-Dankah, D.C. Postellon, M.S. Racine, L. Kleis; Greenville, NC- K. Barnes, S.E. Godwin, H. McCullough, K. Shaheen, G. Buck, L. Noel, M.L. Warren; Greenville, SC- S. Weber, S.M. Parker, I. Gillespie, B.A. Nelson, C.

## SUPPLEMENTARY DATA

Frost, J. Amrhein, E.C. Moreland, A. Hayes, J. Peggram; Hackensack, NJ- J. Aisenberg, M.E Riordan, J. Zasa; Halifax, NS- E. Cummings, K. Scott, T. Pinto, A. Mokashi; Hamilton, ON- K. McAssey, E. Helden; Harrogate, UK- P. Hammond, L. Dinning, S. Rahman, S. Ray; Hartford CT- C. Dimicri, S. Guppy, H. Nielsen; Henderson, NV- C.K. Vogel, C. Ariza, L. Morales; Hershey, PA- Y.T. Chang, R.A. Gabbay, L. Ambrocio, L. Manley; Hollywood, FL- R. Nemery, W. Charlton, P. Smith, L. Kerr, B. Steindel-Kopp, M. Alamaguer; Honolulu, HI- E. Tabisola-Nuesca, A. Pendersen, N. Larson, H. Cooper-Oliver, D. Chan, D. Fitz-Patrick, T. Carreira, Y. Park, R. Ruhaak; Idaho Falls, ID- D. Liljenquist, G. Browning, T. Coughenour, M.B. Sulk; Iowa City, IA- E. Tsalikan, M. Tansey, J. Cabbage; Jackson, MS- N. Dixit, S. Pasha, M. King, K. Adcock, H. Atterberry; Jacksonville, FL- L. Fox, K. Englert, N. Mauras, J. Permuy, K. Sikes; Joliet, IL- T. Berhe, B. Guending, L. McLennan, L. Paganessi, C. Murphy; Kalamazoo, MI- M.B. Draznin, M. Kamboj, S. Sheppard; Kalispell, MT- V. Lewis, L. Coates; Kansas City, MO- W. Moore, G. Babar, J. Bedard, D. Brenson-Hughes, J. Cernich, M. Clements, R. Duprau, S. Goodman, L. Hester, L. Huerta-Saenz, A. Karmazin, T. Letjen, S. Raman; Kingsport, TN- D. Morin, W. Bestermann, E.J. Morawski, J.L. White, A. Brockmyer, R. Bays, S. Campbell, A. Stapleton, N. Stone, A. Donoho, H. Everett, H. Hensley, M. Johnson, C. Marshall, N. Skirvin, P. Taylor, R. Williams, L. Ray, C. Wolverton; Knoxville, TN- D.A. Nickels, C. Dothard; Lake Success, NY- P.W. Speiser, M. Pellizzari, L. Bokor; Las Vegas, NV- K. Izuora, S. Abdelnour, P. Cummings, S. Paynor, M. Leahy, M. Riedl, S. Shockley, R. Saad, T. Briones; Lebanon, NH- S. Casella, C. Herz, K. Walsh; Leichester, UK- J. Greening, F. Hay, S. Hunt, N. Sikotra, L. Simons; Lexington, KY- D.G. Karounos, R. Oremus, L. Dye, L. Myers, D. Ballard, W. Miers, R. Sparks; Little Rock, AR- K.M. Thraikill, K. Edwards, J. Fowlkes, S. Kemp, A. Morales, L. Holland, L. Johnson; Liverpool, UK- P. Paul, A. Ghatak, K. Phelen, H. Leyland, T. Henderson; Livingston, NJ- D. Brenner, E. Oppenheimer, I. Mamkin, C. Moniz; London, ON- C. Clarson, M. Lovell; Los Angeles, CA- A. Peters, V. Ruelas, D. Borut, D. Burt, M. Jordan, S. Castilla, P. Flores, M. Ruiz, L. Hanson, J. Green-Blair, R.J. Sheridan; Louisville, KY- K.A. Wintergerst, G. Pierce, A. Omoruyi, M. Foster, S. Kingery; Lubbock, TX- A. Lunsford, I. Cervantes, T. Parker, P. Price, J. Urben; Manchester, UK- I. Doughty, H. Haydock, V. Parker; Melbourne, Australia- P. Bergman, S. Duncum, C. Rodda; Memphis, TN- A.D. Thomas, R. Ferry, D. McCommon, J. Cockroft; Mesa, AZ- A. Perelman, R. Calendo; Miami, FL- C. Barrera, E. Arce-Nunez, Y. Martinez, M. De la Portilla, I. Cardenas, L. Garrido, M. Villar; Milan, Italy- R. Lorini, E. Calandra, G. D'Annuzio, K. Perri, N. Minuto, C. Rebor, R. Callegari; Milwaukee, WI- O. Ali, J. Kramer, B. Auble, S. Cabrera, P. Donohoue, R. Fiallo-Scharer, M. Hessner, P. Wolfgram, A. Kansra, N. Bettin, R. McCuller, A. Miller; Mineola, NY- S. Accacha, J. Corrigan, E. Fiore, R.L. Levine, T.A. Mahoney; Montreal, QC- C. Polychronakos, V. Gagne; Morristown, NJ- H. Starkman, M. Fox, D. Chin, F. Melchionne, L.A. Silverman; New Brunswick, NJ- I. Marshall, L. Cerracchio, J. Cruz, A. Viswanathan, J. Wilson; New Orleans, LA- S. Chalew, S. Valley, S. Layburn, A. Lala, P. Clesi, M. Genet, G. Uwaifo, A. Charron, T. Allerton, W. Cefalu, L. Melendez-Ramirez, R. Richards, C. Alleyn, E. Gustafson, M. Lizanna; New Port Richey, FL- J. Wahlen, S. Aleiwe, M. Hansen, H. Wahlen; New York, NY- C.J. Levy, A. Bonaccorso, R. Rapaport, Y. Tomer, D. Chia, M. Goldis, L. Iazzetti, M. Klein, C. Levister, L. Waldman, E. Wallach, M.O. Regelmann, Z. Antal, M. Aranda, C. Reynolds; Newcastle Upon Tyne, UK- N. Leech, D. Wake, C. Owens, M. Burns, J. Wotherspoon, A. Murray, K. Short, G. Curry, S. Kelsey, J. Lawson, J. Porter, S. Stevens, E. Thomson, S. Winship, L. Wynn; Newton, NZ- E. Wiltshire, J. Krebs, P. Cresswell, H. Faherty, C. Ross; Norfolk, VA- A. Vinik, P. Barlow, M. Bourcier, M.L. Nevoret; North Adelaide, Australia- J. Couper, S. Beresford; Norwich, UK- N. Thalagne, H. Roper, J. Gibbons, J. Hill, S. Balleaut, C. Brennan, J. Ellis-Gage, L. Fear, T. Gray, L. Jones, C. McNerney, L. Pointer, N. Price, K. Few, D. Tomlinson; Nottingham, UK- L. Denvir, J. Drew, T. Randell, P. Mansell, S.A Bell, S. Butler, Y. Hooton, H. Navarra, A. Roper, G. Babington, L. Crate, H. Cripps, A. Ledlie, C. Moulds, R. Norton, B. Petrova, O. Silkstone, C. Smith; Oak Lawn, IL- K. Ghai, M. Murray, V. Viswanathan, M. Henegan, O. Kawadry; Oakland, CA- J.A. Olson, L. Patterson, T. Ahmad, B. Flores; Oklahoma City, OK- D. Domek, S. Domek, K. Copeland, M. George, J. Less, T. Davis, M. Short; Olympia Fields, IL- A. Dwarakanathan, P. O'Donnell; Omaha, NE- B. Boerner, L. Larson, M. Phillips, M. Rendell, K. Larson, C. Smith, K. Zebrowski, L. Kuechenmeister, M. Thevarayapillai; Orange, CA- M. Daniels, H. Speer, N. Forghani, R. Quintana, C. Reh, A. Bhangoo; Orlando, FL- P. Desrosiers, L. Ireland, T. Mislá, C. Torres, S. Wells, J. Villar, M. Yu, D. Berry, D. Cook, J. Soder, A. Powell; Ormskirk, UK- M. Ng, M. Morrison, Z. Haslam; Ottawa, ON- M. Lawson, B.

## SUPPLEMENTARY DATA

Bradley, J. Courtney, C. Richardson, C. Watson, E. Keely, D. DeCurtis; Palm Beach Gardens, FL- M. Vaccarcello-Cruz, Z. Torres, K. Sandberg; Pensacola, FL- H. Hsiang, B. Joy, D. McCormick, A. Powell, H. Jones, J. Bell, S. Hargadon, S. Hudson, M. Kummer; Peoria, IL- S. Sauder, E. Sutton, K. Gensel, R. Aguirre-Castaneda, V. Benavides Lopez, D. Hemp, S. Allen, J. Stear; Perth, Australia- E. Davis, T. Jones, A. Roberts, J.A Dart, N. Paramalingam; Philadelphia, PA- L.E. Levitt Katz, N. Chaudhary; K.M. Murphy, S.M. Willi, B. Schwartzman; Phoenix, AZ- C. Kapadia, D. Larson, D. McClellan, G. Shaibai, L.A. Kelley, G. Villa, C. Kelley, R. Diamond, M. Kabbani, T. Dajani, F. Hoekstra, M. Magorno; Pittsburgh, PA- J. Holst, V. Chauhan, N. Wilson, P. Bononi, M. Sperl; Plymouth, UK- A. Millward, M. Eaton, L. Dean; Portland, ME- J. Olshan, H. Renna, C. Milliard; Portland, OR- D. Snyder, S. Beaman, K. Burch, J. Chester, A. Ahmann, B. Wollam, D. DeFrang, R. Fitch, K. Jahnke, K. Hanavan, B. Klopfenstein, L. Nicol, R.W. Bergstrom, T. Noland; Poughkeepsie, NY- J. Brodksy, L. Bacon; Providence, RI- J.B. Quintos, L.S. Topor, S. Bialo, B. Bancroft, A.G. Soto; Raleigh, NC- W. Lagarde, H. Lockemer, T. Vanderploeg; Rancho Cucamonga, CA- M.A Ibrahim, M. Huie, V. Sanchez; Rapid City, SD- R. Edelen, R. Marchiando, J. Palmer, T. Repas, M. Wasson, P. Auken, J. Culbertson, T. Kieffer, D. Voorhees, T. Borgwardt, L. DeRaad; Reno, NV- K. Eckert; Richland, WA- E. Isaacson, H. Kuhn, A. Carroll, M. Schubert; Richmond, VA- G. Francis, S. Hagan, T. Le, M. Penn, E. Wickham; Rio Piedras, PR- C. Leyva, K. Rivera, J. Padilla, I. Rodriguez; Rochester, NY- N. Jospe, J. Czyzyk, B. Johnson; Sacramento, CA- U. Nadgir, N. Marlen, G. Prakasam, C. Rieger, N. Glaser, E.C. Heiser, B. Harris; Salt Lake City, UT C. Foster, H. Slater, K. Wheeler, D.L Donaldson, M. Murray; San Antonio, TX- D.E. Hale, R. Tragus, D.R. Word, J. Lynch, L. Pankratz, W. Rogers; San Diego, CA- R. Newfield, S. Holland, M. Hashiguchi, M. Gottschalk, A. Philis-Tsimikas, R. Rosal, S. Franklin, S.M. Guardado; San Francisco, CA- N. Bohannon, M. Garcia; San Jose, CA- T. Aguinaldo, J. Phan, V. Barraza, D. Cohen; Santa Barbara, CA- J. Pinsker, U. Khan, J. Wiley, L. Jovanovic; Santa Clara, CA- P. Misra, M. Wright, D. Cohen, K. Huang; Scottsbluff, NE- M. Skiles, S. Maxcy; Seattle, WA- C. Pihoker, K. Cochrane, J. Fosse, S. Kearns, M. Klingsheim; Sheffield, UK- N. Wright, L. Viles, H. Smith, S. Heller, M. Cunningham, A. Daniels, L. Zeiden, J. Field, R. Walker; Sioux Falls, SD- K.J. Griffin, L. Bartholow, C. Erickson, J. Howard, B. Krabbenhoft, C. Sandman, A. Vanveldhuizen, J. Wurlger, A. Zimmerman, K. Hanisch, L. Davis-Keppen; South Brisbane, Australia- A. Cotterill, J. Kirby, M. Harris, A. Schmidt; Spokane, WA- C. Kishiyama, C. Flores, J. Milton, W. Martin, C. Whysham, A. Yerka, T. Freels, J.M. Hassing, J. Webster; Springfield, IL- R. Green, P. Carter, J. Galloway, D. Hoelzer, S. Roberts, S. Said, P. Sullivan; Springfield, MA- H.F. Allen, E. Reiter, E. Feinberg, C. Johnson; St. John's, NL- L.A. Newhook, D. Hagerty; St. Louis, MO- N.H. White, L. Levandoski; St. Paul, MN- J. Kylo, M. Johnson, C. Benoit; St. Petersburg, FL- P. Iyer, F. Diamond, H. Hosono, S. Jackman, L. Barette, P. Jones; Syracuse, NY- I. Sills, S. Bzdick, J. Bulger, R. Weinstock; Taunton, UK- I. Douek, R. Andrews, G. Modgill, G. Gyorffy, L. Robin, N. Vaidya, S. Crouch, K. O'Brien, C. Thompson, N. Thorne; Toledo, OH- J. Blumer, J. Kalic, L. Klepek, J. Paulett, B. Rosolowski, J. Horner, M. Watkins; Topeka, KS- J.L Casey, K. Carpenter, C. Burns, J. Horton, C. Pritchard, D. Soetaert, A.G. Wynne; Torrance, CA- K. Kaiserman, M. Halvorson; Tucson, AZ- C. Chin, O.Y. Molina, C. Patel, R. Senguttuvan, M. Wheeler, O. Furet, C. Steuhm; Tulsa, OK- D.H Jolley, S. Goudeau, L. Chalmers, D. Greer; Vancouver, B.C- C. Panagiotopoulos, D.L. Metzger, D. Nguyen, M. Horowitz; Walnut Creek, CA- M.P. Christiansen, E. Glades, C. Morimoto, M. Macarewich, R. Norman, K. Patin, C. Vargas, A. Barbanica, A. Yu; Washington D.C- P. Vaidyanathan, W. Osborne, R. Mehra; Wenatchee, WA- S. Kaster, S. Neace, J. Horner; Wilmington, DE- G. Reeves, C. Cordrey, L. Marrs, T. Miller, S. Dowshen, D. Doyle; Winnipeg, Manitoba- S. Walker, D. Catte, H. Dean; Winston-Salem, NC- M. Drury-Brown, B. Hackman; Worcester, MA- M.M.C Lee, S. Malkani, K. Cullen, K. Johnson; Yuma, AZ- P. Hampton, M. McCarrell, C. Curtis, E. Paul, Y. Zambrano.

SUPPLEMENTARY DATA

**Supplementary Table S2.** List of SNPs in the T1D GRS and their weights. The 10 first SNPs are included in the T1D GRS-10.

| SNP                  | Gene            | Odds Ratio | Weight | Effect Allele |
|----------------------|-----------------|------------|--------|---------------|
| rs2187668, rs7454108 | DR3/DR4-DQ8     | 48.18      | 3.87   |               |
|                      | DR3/DR3         | 21.12      | 3.05   |               |
|                      | DR4-DQ8/DR4-DQ8 | 21.98      | 3.09   |               |
|                      | DR4-DQ8/X       | 7.03       | 1.95   |               |
|                      | DR3/X           | 4.53       | 1.51   |               |
| rs1264813            | HLA_A_24        | 1.54       | 0.43   | T             |
| rs2395029            | HLA_B_5701      | 2.5        | 0.92   | T             |
| rs3129889            | HLA_DRB1_15     | 14.88      | 2.70   | A             |
| rs2476601            | PTPN22          | 1.96       | 0.67   | A             |
| rs689                | INS             | 1.75       | 0.56   | T             |
| rs12722495           | IL2RA           | 1.58       | 0.46   | T             |
| rs2292239            | ERBB3           | 1.35       | 0.30   | T             |
| rs10509540           | C10orf59        | 1.33       | 0.29   | T             |
| rs4948088            | COBL            | 1.3        | 0.26   | C             |
| rs7202877            |                 | 1.28       | 0.25   | G             |
| rs12708716           | CLEC16A         | 1.23       | 0.21   | A             |
| rs3087243            | CTLA4           | 1.22       | 0.20   | G             |
| rs1893217            | PTPN2           | 1.2        | 0.18   | G             |
| rs11594656           | IL2RA           | 1.19       | 0.17   | T             |
| rs3024505            | IL10            | 1.19       | 0.17   | G             |
| rs9388489            | C6orf173        | 1.17       | 0.16   | G             |
| rs1465788            |                 | 1.16       | 0.15   | C             |
| rs1990760            | IFIH1           | 1.16       | 0.15   | T             |
| rs3825932            | CTSH            | 1.16       | 0.15   | C             |
| rs425105             |                 | 1.16       | 0.15   | T             |
| rs763361             | CD226           | 1.16       | 0.15   | T             |
| rs4788084            | IL27            | 1.16       | 0.15   | C             |
| rs17574546           |                 | 1.14       | 0.13   | C             |
| rs11755527           | BACH2           | 1.13       | 0.12   | G             |
| rs3788013            | UBASH3A         | 1.13       | 0.12   | A             |
| rs2069762            | IL2             | 1.12       | 0.11   | A             |
| rs2281808            |                 | 1.11       | 0.10   | C             |
| rs5753037            |                 | 1.1        | 0.10   | T             |

**Supplementary Table S3.** Definitions

*Time to clinical T1D:* Time from the initial autoantibody determination to T1D diagnosis or last visit for those who had not progressed to T1D.

*Persistent single autoantibody positivity (SA+):* Having two consecutive autoantibody evaluations that were positive for the same autoantibody (to GAD65, insulin or IA-2A) within one year.

*Time to progression to multiple autoantibody positivity (MA+):* Time from being identified as SA+ (i.e. the first of the two autoantibody determinations that were positive) to the date when the subject was identified as having MA+ (i.e.  $\geq 2$  positive autoantibodies). Those who were still SA+ at the last autoantibody evaluation were censored at their last autoantibody determination.



SUPPLEMENTARY DATA

**Supplementary Table S4.** Baseline characteristics of study participants (n=1,244)

|                                                                     |               |
|---------------------------------------------------------------------|---------------|
| <i>Age when first identified as autoantibody positive: Years</i>    |               |
| Median                                                              | 11.1          |
| Mean                                                                | 16.0          |
| Range                                                               | 1.2 to 51.8   |
| SD                                                                  | 12.77         |
| Missing                                                             | 1             |
| <i>Sex: n (%)</i>                                                   |               |
| Female                                                              | 648 (52.1%)   |
| Male                                                                | 592 (47.6%)   |
| Missing                                                             | 4 (0.3%)      |
| <i>Race: n (%)</i>                                                  |               |
| White                                                               | 1,099 (88.3%) |
| Black/African-American                                              | 30 (2.4%)     |
| Asian/Pacific Islander                                              | 30 (2.4%)     |
| American Indian/Alaskan Native                                      | 15 (1.2%)     |
| Multiracial                                                         | 26 (2.1%)     |
| Unknown/refused/missing                                             | 72 (5.8%)     |
| <i>Ethnicity: n (%)</i>                                             |               |
| Hispanic or Latino                                                  | 111 (8.9%)    |
| Not Hispanic or Latino                                              | 1,089 (87.5%) |
| Unknown/refused/missing                                             | 44 (3.5%)     |
| <i>Autoantibody number when first identified as positive: n (%)</i> |               |
| Single positive autoantibody                                        | 291 (23.4%)   |
| Multiple positive autoantibodies                                    | 953 (76.6%)   |
| <i>DPTRS</i>                                                        |               |
| Median                                                              | 6.6           |
| Range                                                               | 1.8 to 24.4   |
| Missing                                                             | 110           |

Abbreviations: DPTRS: Diabetes Prevention Trial Risk Score. Ab+: autoantibody-positive

SUPPLEMENTARY DATA

**Supplementary Table S5.** Univariate and multivariable results for various risk factors in models for time to progression to T1D in all at-risk Aab+ relatives of T1D probands.

| Factors                     | <i>Univariate models</i> |         | <i>Multivariable model</i> |         | <i>Best Multivariable model</i> |         |
|-----------------------------|--------------------------|---------|----------------------------|---------|---------------------------------|---------|
|                             | HR (95% CI)              | p-value | HR (95% CI)                | p-value | HR (95% CI)                     | p-value |
| T1D GRS*                    | 1.70 (1.43-2.02)         | <0.0001 | 1.29 (1.06-1.57)           | 0.011   | 1.29 (1.06-1.56)                | 0.009   |
| Age at Aab+ determination   | 0.974 (0.966-0.982)      | <0.0001 | 1.01 (1.004-1.02)          | 0.008   | 1.01 (1.003-1.02)               | 0.008   |
| DPT-1 Risk Score            | 2.06 (1.95-2.18)         | <0.0001 | 2.07 (1.94-2.20)           | <0.0001 | 2.08 (1.96-2.21)                | <0.0001 |
| Multiple Aab+               | 3.28 (2.47-4.34)         | <0.0001 | 2.49 (1.83-3.4)            | <0.0001 | 2.62 (1.92-3.57)                | <0.0001 |
| HLA DR3/DR4                 | 1.57 (1.24-1.98)         | 0.0002  | --                         | --      | --                              | --      |
| Male                        | 1.12 (0.93-1.34)         | 0.23    | 0.98 (0.81-1.20)           | 0.87    | --                              | --      |
| Hispanic (vs. non-Hispanic) | 1.17 (0.85-1.60)         | 0.34    | 1.07 (0.76-1.52)           | 0.70    | --                              | --      |

\*HR corresponding to an increase in GRS by 0.05. Abbreviations: Aab+: Islet autoantibody positive, DPTRS: Diabetes Prevention Trial Risk Score, T1D GRS: Type 1 diabetes genetic risk score

SUPPLEMENTARY DATA

**Supplementary Table S5A.**

| <b>Factors</b>                  | <b>Univariate models</b> |                | <b>Multivariable model</b> |                | <b>Best Multivariable model</b> |                |
|---------------------------------|--------------------------|----------------|----------------------------|----------------|---------------------------------|----------------|
|                                 | <b>HR (95% CI)</b>       | <b>p-value</b> | <b>HR (95% CI)</b>         | <b>p-value</b> | <b>HR (95% CI)</b>              | <b>p-value</b> |
| T1D GRS $\geq 0.250$            | 1.95 (1.49-2.55)         | <0.0001        | 1.41 (1.06-1.88)           | 0.017          | 1.45 (1.09-1.92)                | 0.01           |
| Age at Aab+<br>determination    | 0.974 (0.966-<br>0.982)  | <0.0001        | 1.01 (0.997-1.02)          | 0.014          | 1.01 (1.002-1.02)               | 0.015          |
| DPT-1 Risk Score                | 2.06 (1.95-2.18)         | <0.0001        | 2.07 (1.6-2.2)             | <0.0001        | 2.07 (1.95-2.2)                 | <0.0001        |
| Multiple Aab+                   | 3.28 (2.47-4.34)         | <0.0001        | 2.56 (2.1-3.5)             | <0.0001        | 2.69 (1.97-3.66)                | <0.0001        |
| HLA DR3/DR4                     | 1.57 (1.24-1.98)         | 0.0002         | --                         | --             | --                              | --             |
| Male                            | 1.12 (0.93-1.34)         | 0.23           | 0.985 (0.79-1.2)           | 0.88           | --                              | --             |
| Hispanic (vs. non-<br>Hispanic) | 1.17 (0.85-1.60)         | 0.34           | 1.04 (0.58-1.47)           | 0.83           | --                              | --             |

SUPPLEMENTARY DATA

**Supplementary Table S5B.** Univariate and multivariable results for various risk factors in models for time to progression to T1D at-risk Aab+ relatives of T1D probands *with baseline DPT-1 Risk Score ≤ 7.0*.

| Factors                     | <i>Univariate models</i> |         | <i>Multivariable model</i> |         | <i>Best Multivariable model</i> |         |
|-----------------------------|--------------------------|---------|----------------------------|---------|---------------------------------|---------|
|                             | HR (95% CI)              | p-value | HR (95% CI)                | p-value | HR (95% CI)                     | p-value |
| T1D GRS*                    | 1.94 (1.41-2.69)         | <0.0001 | 1.66 (1.18-2.34)           | 0.003   | 1.68 (1.21-2.34)                | 0.002   |
| Age at Aab+ determination   | 0.98 (0.97-0.997)        | 0.016   | 1.01 (0.997-1.03)          | 0.12    | 1.01 (0.996-1.03)               | 0.14    |
| DPT-1 Risk Score            | 2.12 (1.63-2.74)         | <0.0001 | 2.16 (1.6-2.92)            | <0.0001 | 2.08 (1.96-2.21)                | <0.0001 |
| Multiple Aab+               | 4.18 (2.52-6.96)         | <0.0001 | 3.51 (2.1-5.88)            | <0.0001 | 2.62 (1.92-3.57)                | <0.0001 |
| HLA DR3/DR4                 | 1.54 (0.97-2.46)         | 0.068   | --                         | --      | --                              | --      |
| Male                        | 1.27 (0.9-1.79)          | 0.17    | 1.13 (0.79-1.62)           | 0.50    | --                              | --      |
| Hispanic (vs. non-Hispanic) | 1.04 (0.55-1.99)         | 0.90    | 1.11 (0.58-2.13)           | 0.76    | --                              | --      |

\*HR corresponding to an increase in GRS by 0.05. Abbreviations: Aab+: Islet autoantibody positive, DPTRS: Diabetes Prevention Trial Risk Score, T1D GRS: Type 1 diabetes genetic risk score

SUPPLEMENTARY DATA

| <b>Factors</b>              | <b><i>Univariate models</i></b> |                | <b><i>Multivariable model</i></b> |                | <b><i>Best Multivariable model</i></b> |                |
|-----------------------------|---------------------------------|----------------|-----------------------------------|----------------|----------------------------------------|----------------|
|                             | <b>HR (95% CI)</b>              | <b>p-value</b> | <b>HR (95% CI)</b>                | <b>p-value</b> | <b>HR (95% CI)</b>                     | <b>p-value</b> |
| T1D GRS $\geq 0.250$        | 2.66 (1.55-4.55)                | 0.0004         | 2.11 (1.23-3.62)                  | 0.007          | 2.20                                   | 0.004          |
| Age at Aab+ determination   | 0.98 (0.97-0.997)               | 0.016          | 1.01 (0.99-1.03)                  | 0.23           | 1.009 (0.99-1.02)                      | 0.27           |
| DPT-1 Risk Score            | 2.12 (1.63-2.74)                | <0.0001        | 2.08 (1.55-2.80)                  | <0.0001        | 2.19 (1.64-2.92)                       | <0.0001        |
| Multiple Aab+               | 4.18 (2.52-6.96)                | <0.0001        | 3.63 (2.17-6.07)                  | <0.0001        | 3.87 (2.33-6.44)                       | <0.0001        |
| HLA DR3/DR4                 | 1.54 (0.97-2.46)                | 0.068          | --                                | --             | --                                     | --             |
| Male                        | 1.27 (0.9-1.79)                 | 0.17           | 1.12 (0.78-1.6)                   | 0.53           | --                                     | --             |
| Hispanic (vs. non-Hispanic) | 1.04 (0.55-1.99)                | 0.90           | 1.07 (0.56-2.05)                  | 0.84           | --                                     | --             |

SUPPLEMENTARY DATA

**Supplementary Table S6.** Univariate and multivariable results for various risk factors in models for time to progression to T1D in multiple Aab+ relatives of T1D probands.

| Factors                            | <i>Univariate models</i> |         | <i>Multivariable model</i> |         | <i>Best Multivariable model</i> |         |
|------------------------------------|--------------------------|---------|----------------------------|---------|---------------------------------|---------|
|                                    | HR (95% CI)              | p-value | HR (95% CI)                | p-value | HR (95% CI)                     | p-value |
| T1D GRS*                           | 1.59 (1.33-1.89)         | <0.0001 | 1.26 (1.02-1.59)           | 0.021   | 1.27 (1.05-1.54)                | 0.015   |
| Age at multiple Aab+ determination | 0.97 (0.96-0.98)         | <0.0001 | 1.01 (0.998-1.02)          | 0.10    | 1.01 (0.998-1.02)               | 0.12    |
| DPT-1 Risk Score                   | 2.03 (1.91-2.15)         | <0.0001 | 2.03 (1.91-2.16)           | <0.0001 | 2.04 (1.92-2.18)                | <0.0001 |
| HLA DR3/DR4                        | 1.39 (1.1-1.77)          | 0.0065  | --                         | --      | --                              | --      |
| Male                               | 1.15 (0.95-1.38)         | 0.15    | 1.004 (0.82-1.23)          | 0.97    | --                              | --      |
| Hispanic (vs. non-Hispanic)        | 1.25 (0.9-1.73)          | 0.18    | 1.08 (0.75-1.54)           | 0.69    | --                              | --      |

\*HR corresponding to an increase in GRS by 0.05. Abbreviations: Aab+: Islet autoantibody positive, DPTRS: Diabetes Prevention Trial Risk Score, T1D GRS: Type 1 diabetes genetic risk score

SUPPLEMENTARY DATA

**Supplementary Table S6A.**

| <b>Factors</b>                     | <b><i>Univariate models</i></b> |                | <b><i>Multivariable model</i></b> |                | <b><i>Best Multivariable model</i></b> |                |
|------------------------------------|---------------------------------|----------------|-----------------------------------|----------------|----------------------------------------|----------------|
|                                    | <b>HR (95% CI)</b>              | <b>p-value</b> | <b>HR (95% CI)</b>                | <b>p-value</b> | <b>HR (95% CI)</b>                     | <b>p-value</b> |
| T1D GRS $\geq 0.250$               | 1.89 (1.43-2.50)                | <0.0001        | 1.38 (1.03-1.84)                  | 0.032          | 1.42 (1.07-1.90)                       | 0.017          |
| Age at multiple Aab+ determination | 0.97 (0.96-0.98)                | <0.0001        | 1.01 (0.998-1.02)                 | 0.14           | 1.007 (0.997-1.02)                     | 0.16           |
| DPT-1 Risk Score                   | 2.03 (1.91-2.15)                | <0.0001        | 2.03 (1.91-2.17)                  | <0.0001        | 2.05 (1.92-2.18)                       | <0.0001        |
| HLA DR3/DR4                        | 1.39 (1.1-1.77)                 | 0.0065         | --                                | --             | --                                     | --             |
| Male                               | 1.15 (0.95-1.38)                | 0.15           | 1.008 (0.82-1.23)                 | 0.94           | --                                     | --             |
| Hispanic (vs. non-Hispanic)        | 1.25 (0.9-1.73)                 | 0.18           | 1.04 (0.73-1.49)                  | 0.81           | --                                     | --             |

SUPPLEMENTARY DATA

**Supplementary Table S6B.** Univariate and multivariable results for various risk factors in models for time to progression to T1D in multiple Aab+ relatives of T1D probands *with baseline DPT-1 Risk Score ≤ 7.0*.

| Factors                            | <i>Univariate models</i> |         | <i>Multivariable model</i> |         | <i>“Best” Multivariable model</i> |         |
|------------------------------------|--------------------------|---------|----------------------------|---------|-----------------------------------|---------|
|                                    | HR (95% CI)              | p-value | HR (95% CI)                | p-value | HR (95% CI)                       | p-value |
| T1D GRS*                           | 1.73 (1.25-2.38)         | 0.0008  | 1.59 (1.13-2.22)           | 0.007   | 1.63 (1.17-2.26)                  | 0.004   |
| Age at multiple Aab+ determination | 0.98 (0.97-0.99)         | 0.004   | 1.01 (0.99-1.025)          | 0.31    | 1.008 (0.99-1.02)                 | 0.36    |
| DPT-1 Risk Score                   | 2.16 (1.66-2.82)         | <0.0001 | 2.16 (1.58-2.95)           | <0.0001 | 2.26 (1.67-3.07)                  | <0.0001 |
| HLA DR3/DR4                        | 1.32 (0.83-2.11)         | 0.25    | --                         | --      | --                                | --      |
| Male                               | 1.32 (0.93-1.87)         | 0.12    | 1.10 (0.76-1.58)           | 0.61    | --                                | --      |
| Hispanic (vs. non-Hispanic)        | 1.23 (0.64-2.36)         | 0.54    | 1.19 (0.62-2.31)           | 0.60    | --                                | --      |

\*HR corresponding to an increase in GRS by 0.05. Abbreviations: Aab+: Islet autoantibody positive, DPTRS: Diabetes Prevention Trial Risk Score, T1D GRS: Type 1 diabetes genetic risk score



SUPPLEMENTARY DATA

| <b>Factors</b>                     | <b>Univariate models</b> |                | <b>Multivariable model</b> |                | <b>“Best” Multivariable model</b> |                |
|------------------------------------|--------------------------|----------------|----------------------------|----------------|-----------------------------------|----------------|
|                                    | <b>HR (95% CI)</b>       | <b>p-value</b> | <b>HR (95% CI)</b>         | <b>p-value</b> | <b>HR (95% CI)</b>                | <b>p-value</b> |
| T1D GRS $\geq 0.250$               | 2.39 (1.39-4.09)         | 0.0015         | 1.94 (1.12-3.34)           | 0.017          | 2.07 (1.21-3.55)                  | 0.008          |
| Age at multiple Aab+ determination | 0.98 (0.97-0.99)         | 0.004          | 1.007 (0.99-1.02)          | 0.44           | 1.006 (0.99-1.02)                 | 0.49           |
| DPT-1 Risk Score                   | 2.16 (1.66-2.82)         | <0.0001        | 2.09 (1.54-2.85)           | <0.0001        | 2.20 (1.62-2.97)                  | <0.0001        |
| HLA DR3/DR4                        | 1.32 (0.83-2.11)         | 0.25           | --                         | --             | --                                | --             |
| Male                               | 1.32 (0.93-1.87)         | 0.12           | 1.09 (0.76-1.57)           | 0.64           | --                                | --             |
| Hispanic (vs. non-Hispanic)        | 1.23 (0.64-2.36)         | 0.54           | 1.15 (0.6-2.23)            | 0.67           | --                                | --             |

SUPPLEMENTARY DATA

**Supplementary Table S7.** Univariate and multivariable results for various risk factors in models for time to progression to multiple positive autoantibodies in initially non-diabetic, single autoantibody positive relatives of T1D probands.

| Factors                          | <i>Univariate models</i> |         | <i>Multivariable model</i> |         |
|----------------------------------|--------------------------|---------|----------------------------|---------|
|                                  | HR (95% CI)              | p-value | HR (95% CI)                | p-value |
| T1D GRS*                         | 1.43 (1.05-1.95)         | 0.024   | 1.49 (1.08-2.05)           | 0.015   |
| Age at single Aab+ determination | 0.995 (0.98-1.006)       | 0.4     | 0.994 (0.98-1.005)         | 0.29    |
| IAA+ (vs. not)                   | 0.78 (0.55-1.12)         | 0.18    | 0.78 (0.54-1.13)           | 0.19    |
| HLA DR3/DR4                      | 2.3 (1.37-3.86)          | 0.002   | --                         | --      |
| Male                             | 1.09 (0.8-1.49)          | 0.58    | 1.10 (0.79-1.52)           | 0.57    |
| Hispanic (vs. non-Hispanic)      | 0.93 (0.54-1.61)         | 0.8     | 0.98 (0.56-1.70)           | 0.93    |

\*HR corresponding to an increase in GRS by 0.05. Abbreviations: Aab+: Islet autoantibody positive, DPTRS: Diabetes Prevention Trial Risk Score, T1D GRS: Type 1 diabetes genetic risk score

SUPPLEMENTARY DATA

| <b>Factors</b>                   | <b><i>Univariate models</i></b> |                | <b><i>Multivariable model</i></b> |                | <b><i>“Best” Multivariable model</i></b> |                |
|----------------------------------|---------------------------------|----------------|-----------------------------------|----------------|------------------------------------------|----------------|
|                                  | <b>HR (95% CI)</b>              | <b>p-value</b> | <b>HR (95% CI)</b>                | <b>p-value</b> | <b>HR (95% CI)</b>                       | <b>p-value</b> |
| T1D GRS $\geq 0.295$             | 2.18 (1.42-3.34)                | 0.0004         | 2.27 (1.47-3.51)                  | 0.0002         | 2.25 (1.46-3.45)                         | 0.00023        |
| Age at single Aab+ determination | 0.995 (0.98-1.006)              | 0.4            | 0.995 (0.98-1.006)                | 0.37           | --                                       | --             |
| IAA+ (vs. not)                   | 0.78 (0.55-1.12)                | 0.18           | 0.75 (0.52-1.08)                  | 0.12           | 0.75 (0.53-1.08)                         | 0.12           |
| HLA DR3/DR4                      | 2.3 (1.37-3.86)                 | 0.002          | --                                | --             | --                                       | --             |
| Male                             | 1.09 (0.8-1.49)                 | 0.58           | 1.12 (0.81-1.55)                  | 0.50           | --                                       | --             |
| Hispanic (vs. non-Hispanic)      | 0.93 (0.54-1.61)                | 0.8            | 0.90 (0.52-1.56)                  | 0.71           | --                                       | --             |

SUPPLEMENTARY DATA

**Supplementary Figure S1.** Time to type 1 diabetes in initially non-diabetic, autoantibody positive relatives of patients, by DPTRS ( $\leq 7$  vs.  $>7$ ), number of positive autoantibodies (Ab) and T1DGRS ( $<0.25$  vs.  $\geq 0.25$ ). Abbreviations: Ab: Autoantibody. DPTRS: Diabetes Prevention Trial Risk Score. T1D: Type 1 diabetes. GRS: Genetic risk score

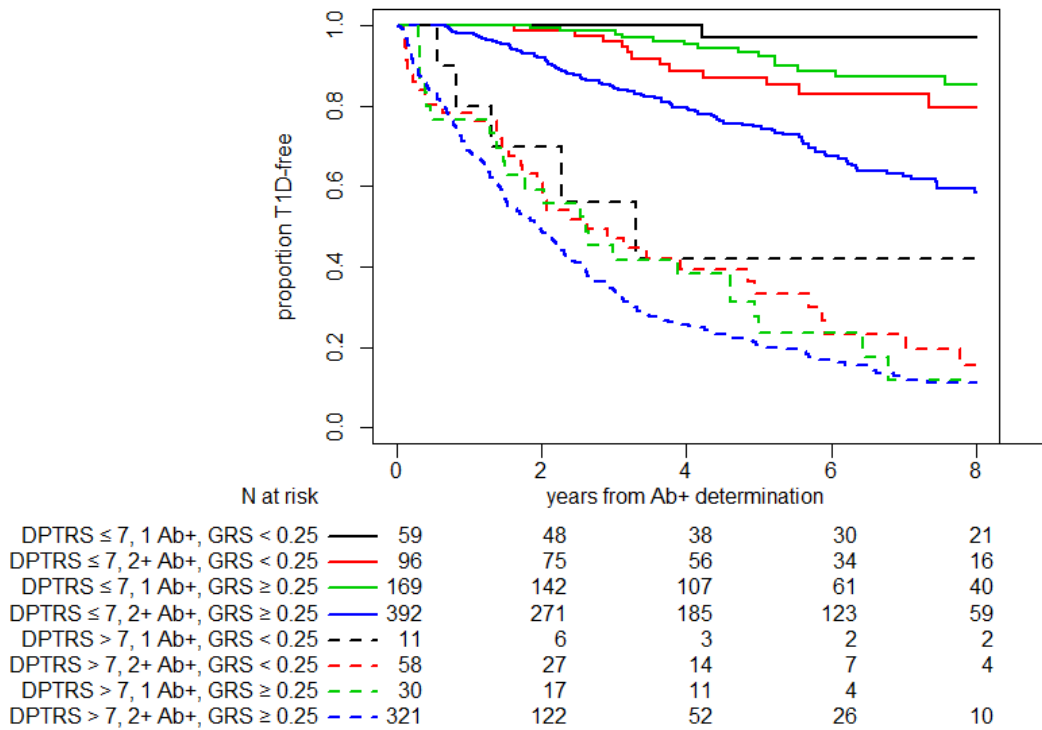

Supplement: DC180087SupplementaryData.pdf [file DC180087SupplementaryData.pdf]
